# Supplementary material for: Investigation of carbon nanotube webs as counter electrodes in a new organic electrolyte based dye sensitized solar cell
Source: Royal Society of Chemistry journal article supplement (doi:10.1039/c1jm15055c), 2011-11-10
Supplement: c1jm15055c.pdf [file c1jm15055c.pdf]

## Investigation of Carbon Nanotube Webs as Novel Material for Counter Electrodes in a New Organic Electrolyte Based Dye Sensitized Solar Cell

Dalal Noureldine,<sup>a</sup> Tharallah Shoker,<sup>a</sup> Mustafa Musameh<sup>b</sup> and Tarek H. Ghaddar<sup>a\*</sup>

### Supporting Information

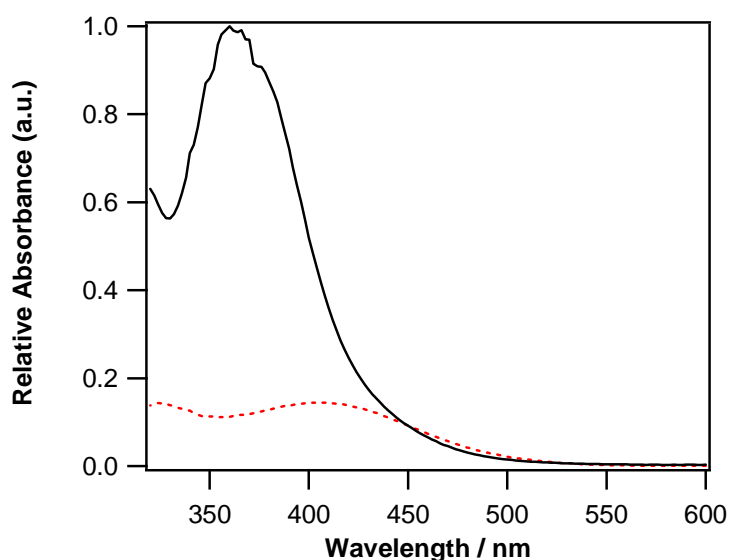

**Figure S1:** Relative absorption spectra of 1.0 M 1-methyl-3-propyl imidazolium iodide and .15 M I<sub>2</sub> in acetonitrile (solid-black), and 1.0 M T and 0.15 M DT in acetonitrile (dotted-red).

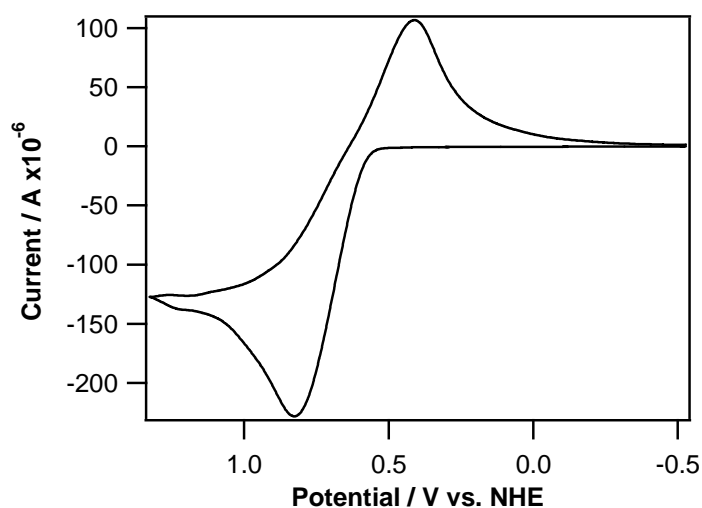

**Figure S2:** Cyclic voltammogram of T/DT electrolyte in acetonitrile with 0.1 M TBAPF<sub>6</sub>.

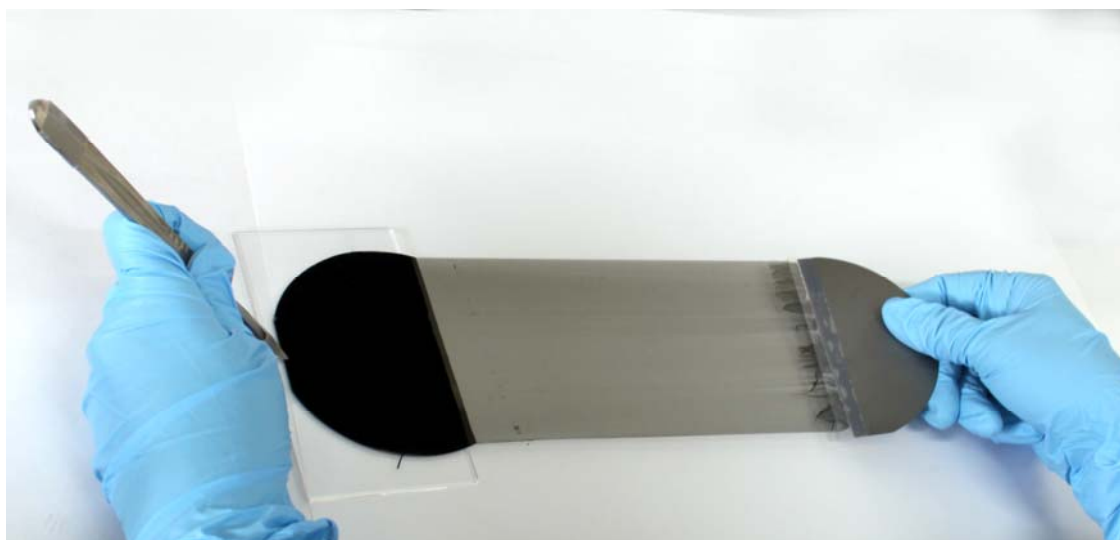

**Figure S2:** Photograph of a drawn film of MWCNT webs from an MWCT forest grown on a ceramic substrate.

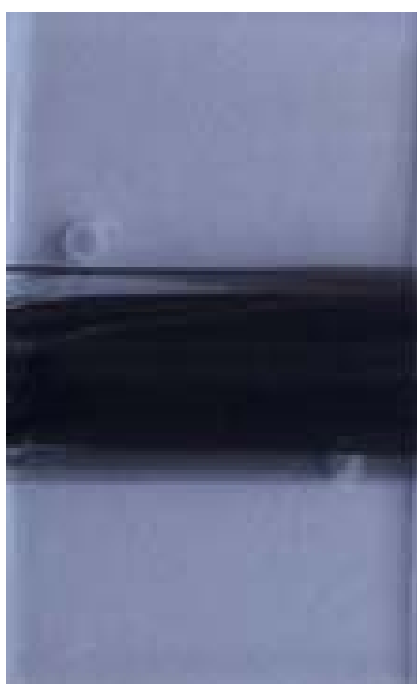

**Figure S3:** Photograph of a counter electrode prepared with 20 layers of MWCNT webs on an FTO substrate.

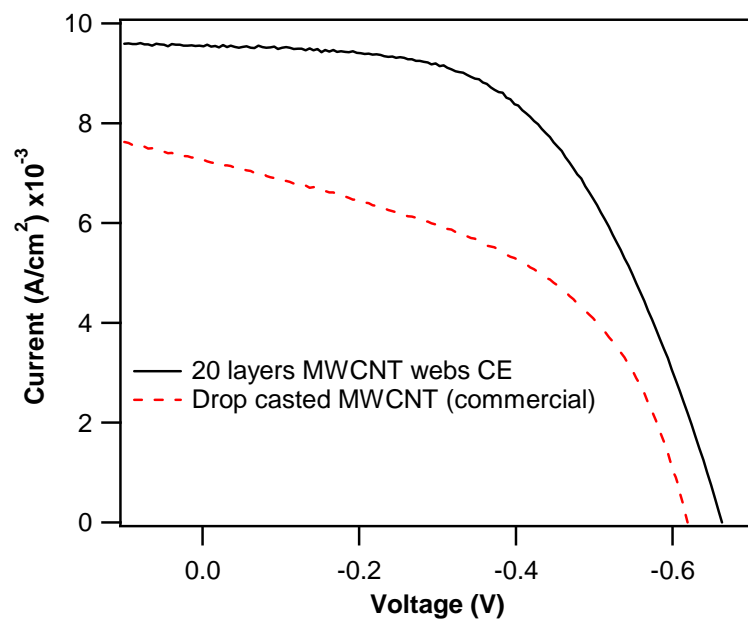

**Figure S4:** Photocurrent-voltage ( $J$ - $V$ ) curves of device E with 20 layers of MWCNT webs as the counter electrode (solid-black), and a device made with commercial MWCNT. Measured under  $100 \text{ mW}\cdot\text{cm}^{-2}$  simulated AM1.5 spectrum with an active area =  $0.126 \text{ cm}^2$  and a spacer thickness  $l = 60 \mu\text{m}$ .
